# Supplementary material for: Antifungal Activity of Avocado Seed Recombinant GASA/Snakin PaSn
Source: MDPI journal article supplement (doi:10.3390/antibiotics11111558), 2022-11-05
Supplement: s1 [file s1]

### Supplementary material

**Table S1.** Recombinant purified avocado PaSn amino acid sequences obtained by MALDI-TOF and their corresponding association with predicted sequences from the databases<sup>a</sup>.

| Number | Sequence                     | Range  | #PSMs | XCorr |
|--------|------------------------------|--------|-------|-------|
| 1      | NLLQQIDCGTSCSAR              | 40-54  | 32    | 5.35  |
| 2      | CNCVPSGTAGNLDECPCYANMTTHGKNK | 75-101 | 3     | 4.54  |
| 3      | NLLQQIDCGTSCSAR              | 40-54  | 2     | 3.55  |
| 4      | RACGTCCAR                    | 66-74  | 8     | 3.07  |
| 5      | NLLQQIDCGTSCSARCR            | 40-56  | 1     | 3.00  |
| 6      | ACGTCCAR                     | 67-74  | 13    | 2.12  |
| 7      | CNCVPSGTAGNLDECPCYANMTTHGNKR | 75-102 | 1     | 1.83  |
| 8      | LSSRPR                       | 57-62  | 19    | 1.82  |

<sup>a</sup>The peptides were alkylated with iodoacetamide. The final score=210.28 and sequence coverage=57.14 were detected.
